# Supplementary material
Source: HighWire-hosted journal article supplement (https://erj.ersjournals.com/content/58/2/2002990)
Supplement: inline-supplementary-material-1 [file inline-supplementary-material-1.pdf]

## European Respiratory Society guidelines for the management of children and adolescents with bronchiectasis (Online Supplement - Further description of methods)

### **Disclosure of potential conflicts of interest (Col)**

All potential Col according to ERS policy were declared and compliance monitored by the chairs. None declared potential Col, but it was planned that those with Col would abstain from question-specific discussions and recommendations.

### **Professional background of the panel**

| <b><u>Name</u></b>    | <b><u>Speciality</u></b>                                                                     |
|-----------------------|----------------------------------------------------------------------------------------------|
| Ahmad Kantar          | Respiratory Paediatrics, previous ERS guidelines, Co-chair                                   |
| Anne Chang            | Respiratory Paediatrics, Cochrane, Co-chair                                                  |
| Efthymia Alexopoulou  | Paediatric Radiology                                                                         |
| Leanne Bell           | Parent-Patient Advocate                                                                      |
| Jeanette Boyd         | European Lung Foundation representative and patient advocate                                 |
| Andy Bush             | Respiratory Paediatrics, links with primary ciliary dyskinesia guidelines                    |
| James Chalmers        | Respiratory adults, ERS adult bronchiectasis guideline, EMBARC                               |
| Rebecca Fortescue     | General Practitioner and Joint Co-ordinating Editor, Cochrane Airways Group                  |
| Keith Grimwood        | Infectious Diseases and General Paediatrics                                                  |
| Adam Hill             | Respiratory adults, EMBARC, ERS and British Thoracic Society adult bronchiectasis guidelines |
| Bulent Karadag        | Respiratory Paediatrics, Health in low-middle income countries                               |
| Gabrielle McCallum    | Registered Nurse, Early Career Researcher                                                    |
| Fabio Midulla         | Respiratory Paediatrics                                                                      |
| Zena Powell           | Parent-Patient Advocate                                                                      |
| Deborah Snijders      | Respiratory Paediatrics                                                                      |
| Woo-Jung Song         | Allergy and Clinical Immunology                                                              |
| Thomy Tonia           | Senior ERS Methodologist                                                                     |
| Christine Wilson      | Paediatric Respiratory Physiotherapist                                                       |
| Angela Zacharasiewicz | Respiratory Paediatrics                                                                      |

### **Additional description of methodology used**

For each PICO and narrative question (NQ), at least two people (pairs and/or Fortescue/Chang) screened all the abstracts from the searches. The results were uploaded onto Rayyan (<https://rayyan.qcri.org/>) and the abstracts selected for retrieving full articles were undertaken. Any disagreements were resolved by consensus among the pairs and/or Fortescue/Chang. We used the specific inclusion and exclusion criteria outlined below for each PICO. Our generic inclusion criteria were children/adolescents aged 0-18 years with bronchiectasis from any cause (other than cystic fibrosis [CF]) and our hierarchy of evidence was RCTs and systematic reviews in children/adolescents. Where there were no RCT data in children/adolescents, we then used systematic reviews in adults with bronchiectasis and finally observational studies in children/adolescents.

We excluded studies published before 1982 (when chest CT-scans became available for diagnosing bronchiectasis). We also excluded systematic reviews where the data within these earlier published reviews were captured in systematic reviews undertaken at later dates. Although our

search strategy (see supplement-search strategy) included all languages, we only included publications in the English language.

The literature search (see Supplement-search strategies for further details) for all questions were based on the a-priori defined criteria outlined below. However, for selected PICOs where there was a lack of evidence, the use of additional search and supportive evidence was discussed. When the panel agreed, we sought supportive evidence from the literature, including the CF literature (as further described where relevant in the PICOs below). These are mentioned in the paragraphs below the relevant tables. A PRISMA diagram was generated for each PICO and NQ (Supplement Figures).

In the EtDs (see Supplement-ETD), for sections where we state there are no data, it refers to data within the included studies.

### PICO Question 1:

**In children/adolescents suspected of bronchiectasis;**

**(a) Should multidetector chest computed tomography (MDCT) scans with high-resolution CT (HRCT) be used instead of conventional HRCT alone for diagnosing bronchiectasis?**

**(b) What CT criteria for broncho-arterial dilatation (BAR) should be used?**

| Inclusion                                                      | Exclude                  | Intervention | Comparator | Study design | Setting                            | Publications if no RCTs in children                                        | Timing         |
|----------------------------------------------------------------|--------------------------|--------------|------------|--------------|------------------------------------|----------------------------------------------------------------------------|----------------|
| Children/adolescents with BE aged 0-18 yrs investigated for BE | CF or papers before 1982 |              |            | RCT and obs  | Any (hospital, out-patients, home) | Systematic reviews in adults (last 10 years). Exclude non-English articles | Not applicable |

CF=cystic fibrosis; BE=bronchiectasis; Obs=observational

For PICO1, only two adult-based studies provided direct data that addressed the PICO. As it was considered important to look at the outcomes chosen for the PICO, we included data that provided indirect evidence for using any CT-scan. These data were summarised in the narrative summary table (Supplement-EtD).

### PICO Question 2:

**In children/adolescents with bronchiectasis, should asthma-type treatments (inhaled corticosteroids [ICS], short-acting beta<sub>2</sub> agonists [SABA], long-acting beta<sub>2</sub> agonists [LABA]), compared to no asthma-type treatment, be used routinely? Subgroup analyses for (a) short versus long-term and (b) stable versus exacerbation states.**

| Inclusion                                                    | Exclude                  | Intervention                  | Comparator            | Study design | Setting                            | Publications if no RCTs in children                                        | Timing                                   |
|--------------------------------------------------------------|--------------------------|-------------------------------|-----------------------|--------------|------------------------------------|----------------------------------------------------------------------------|------------------------------------------|
| Children/adolescents with BE aged 0-18 yrs (from all causes) | CF or papers before 1982 | Any SABA, LABA, ICS, ICS-LABA | Placebo, no treatment | RCT and obs  | Any (hospital, out-patients, home) | Systematic reviews in adults (last 10-years). Exclude non-English articles | Stable: >4-weeks; Exacerbation: ≤4-weeks |

For PICO2, the panel considered including large observational studies reporting adverse events of ICS. This is because of the importance of the increasing concerns regarding the adverse events of ICS and the absence of paediatric studies. The evidence table generated from these data was hence developed and presented as part of the evidence tables for this PICO (Supplement-EtD).

### PICO Question 3:

**In children/adolescents with bronchiectasis, should mucoactive agents (compared to no mucoactive agents) be used routinely? Subgroup analyses for (a) short versus long-term, (b) stable versus exacerbation states, and (c) type of mucoactive agent.**

| Inclusion                                                    | Exclude                  | Intervention                            | Comparator            | Study design | Setting                            | Publications if no RCTs in children                                        | Timing                                      |
|--------------------------------------------------------------|--------------------------|-----------------------------------------|-----------------------|--------------|------------------------------------|----------------------------------------------------------------------------|---------------------------------------------|
| Children/adolescents with BE aged 0-18 yrs (from all causes) | CF or papers before 1982 | Any mucoactive agents (oral, nebulised) | Placebo, no treatment | RCT and obs  | Any (hospital, out-patients, home) | Systematic reviews in adults (last 10-years). Exclude non-English articles | Stable: >4-weeks;<br>Exacerbation: ≤4-weeks |

There were no data in children/adolescents. RCTs in adults were restricted to interventions longer than 2-days (i.e. there were several studies involving single doses of mannitol and hypertonic saline).

### PICO Question 4:

**In children/adolescents with bronchiectasis, should regular airway clearance techniques (ACT) (compared to no ACT) be undertaken? Subgroup analyses for (a) short versus long-term and (b) stable versus exacerbation states.**

| Inclusion                                                    | Exclude                  | Intervention                                   | Comparator                    | Study design | Setting                            | Publications if no RCTs in children                                        | Timing                                      |
|--------------------------------------------------------------|--------------------------|------------------------------------------------|-------------------------------|--------------|------------------------------------|----------------------------------------------------------------------------|---------------------------------------------|
| Children/adolescents with BE aged 0-18 yrs (from all causes) | CF or papers before 1982 | Any airway clearance technique (+/- apparatus) | Placebo, sham or no treatment | RCT and obs  | Any (hospital, out-patients, home) | Systematic reviews in adults (last 10-years). Exclude non-English articles | Stable: >4-weeks;<br>Exacerbation: ≤4-weeks |

After undertaking the searches using the criteria above (see Supplement-search strategy for keywords), the Task Force panel decided to review CF-related data to enhance the narrative evidence, as there were little data in children/adolescents without CF. Thus, in addition to the search undertaken by the external librarian (see Supplement on search strategy), we searched data related to CF for supportive evidence. These searches were limited to PubMed and Cochrane databases and included only systematic reviews in humans aged 0-18 years in the last 5-years. These additional searches were undertaken on 19<sup>th</sup> July 2019 and 10 April 2020. Of the 77 articles identified, three papers were retrieved [1,2,3] to provide supportive evidence.

**PICO Question 5:**

**In children/adolescents with bronchiectasis, should systemic courses of antibiotics (compared to no antibiotics) be used to treat an acute respiratory exacerbation (type and duration)?**

| Inclusion                                                    | Exclude                  | Intervention                        | Comparator            | Study design | Setting                            | Publications if no RCTs in children                                        | Timing |
|--------------------------------------------------------------|--------------------------|-------------------------------------|-----------------------|--------------|------------------------------------|----------------------------------------------------------------------------|--------|
| Children/adolescents with BE aged 0-18 yrs (from all causes) | CF or papers before 1982 | Any antibiotics (oral, inhaled, IV) | Placebo, no treatment | RCT and obs  | Any (hospital, out-patients, home) | Systematic reviews in adults (last 10-years). Exclude non-English articles | <4-wks |

**PICO Question 6:**

**In children/adolescents with bronchiectasis, should eradication treatment be used (irrespective of symptoms) when there is a new isolate of a potentially pathogenic microorganism (compared to no eradication treatment)?**

| Inclusion                                                    | Exclude                  | Intervention                        | Comparator            | Study design | Setting                           | Publications if no RCTs in children                                        | Timing |
|--------------------------------------------------------------|--------------------------|-------------------------------------|-----------------------|--------------|-----------------------------------|----------------------------------------------------------------------------|--------|
| Children/adolescents with BE aged 0-18 yrs (from all causes) | CF or papers before 1982 | Any antibiotics (oral, inhaled, IV) | Placebo, no treatment | RCT and obs  | Any (hospital out-patients, home) | Systematic reviews in adults (last 10-years). Exclude non-English articles | Any    |

For the same rationale as for PICO-4, the taskforce panel decided to review CF-related data to enhance the narrative evidence, given the lack of data in children. Thus, in addition to the search undertaken by the external librarian (see supplement on search), we searched data related to CF for supportive evidence. The same process was undertaken as for PICO-4.

**PICO Question 7:**

**In children/adolescents with bronchiectasis and recurrent exacerbations, should long-term (≥2-months) antibiotics (compared to no antibiotics) be used to reduce exacerbations?**

| Inclusion                                                    | Exclude                  | Intervention                        | Comparator            | Study design | Setting                            | Publications if no RCTs in children                                        | Timing    |
|--------------------------------------------------------------|--------------------------|-------------------------------------|-----------------------|--------------|------------------------------------|----------------------------------------------------------------------------|-----------|
| Children/adolescents with BE aged 0-18 yrs (from all causes) | CF or papers before 1982 | Any antibiotics (oral, inhaled, IV) | Placebo, no treatment | RCT and obs  | Any (hospital, out-patients, home) | Systematic reviews in adults (last 10-years). Exclude non-English articles | >2-months |

**References**

- 1 Warnock L, Gates A. Chest physiotherapy compared to no chest physiotherapy for cystic fibrosis. *Cochrane Database Syst Rev* 2015; CD001401.
- 2 Button BM, Wilson C, Dentice R, et al. Physiotherapy for cystic fibrosis in Australia and New Zealand: A clinical practice guideline. *Respirology* 2016; 21: 656-667.
- 3 Wilson LM, Morrison L, Robinson KA. Airway clearance techniques for cystic fibrosis: an overview of Cochrane systematic reviews. *Cochrane Database Syst Rev* 2019; 1: CD011231.
